# Supplementary material for: Enhanced performance of Mo2P monolayer as lithium-ion battery anode materials by carbon and nitrogen doping: a first principles study
Source: Royal Society of Chemistry journal article supplement (doi:10.1039/d0cp06428a), 2021-01-01
Supplement: d0cp06428a1.pdf [file d0cp06428a1.pdf]

## Supporting Information

# Enhanced performance of Mo<sub>2</sub>P monolayer as lithium-ion battery anode materials by carbon and nitrogen doping: a first principles study

Xinghui Liu,<sup>1,2</sup> Shiru Lin,<sup>3</sup> Jian Gao,<sup>4</sup> Hu Shi<sup>7</sup>, Seong-Gon Kim,<sup>5</sup> Zhongfang Chen,<sup>3\*</sup> Hyoyoung Lee<sup>1,2,6\*</sup>

1. Center for Integrated Nanostructure Physics (CINAP), Institute of Basic Science (IBS), 2066 Seoburo, Jangan-Gu, Suwon 16419, Republic of Korea

2. Department of Chemistry, Sungkyunkwan University (SKKU), 2066 Seoburo, Jangan-Gu, Suwon 16419, Republic of Korea

3. Department of Chemistry University of Puerto Rico, Rio Piedras Campus, San Juan, USA Campus

4. State Key Laboratory of Organic-Inorganic Composites, Beijing University of Chemical Technology, Beijing 100029, China

5. Department of Physics and Astronomy, Mississippi State University, Mississippi State, MS 39762, USA

6. Department of Biophysics, Sungkyunkwan University (SKKU), 2066 Seoburo, Jangan-Gu, Suwon 16419, Republic of Korea

7. School of Chemistry and Chemical Engineering, Shanxi University, Taiyuan, People's Republic of China

\*Corresponding author: [zhongfangchen@gmail.com](mailto:zhongfangchen@gmail.com) (Z.C.), [hyoyoung@skku.edu](mailto:hyoyoung@skku.edu) (HL)

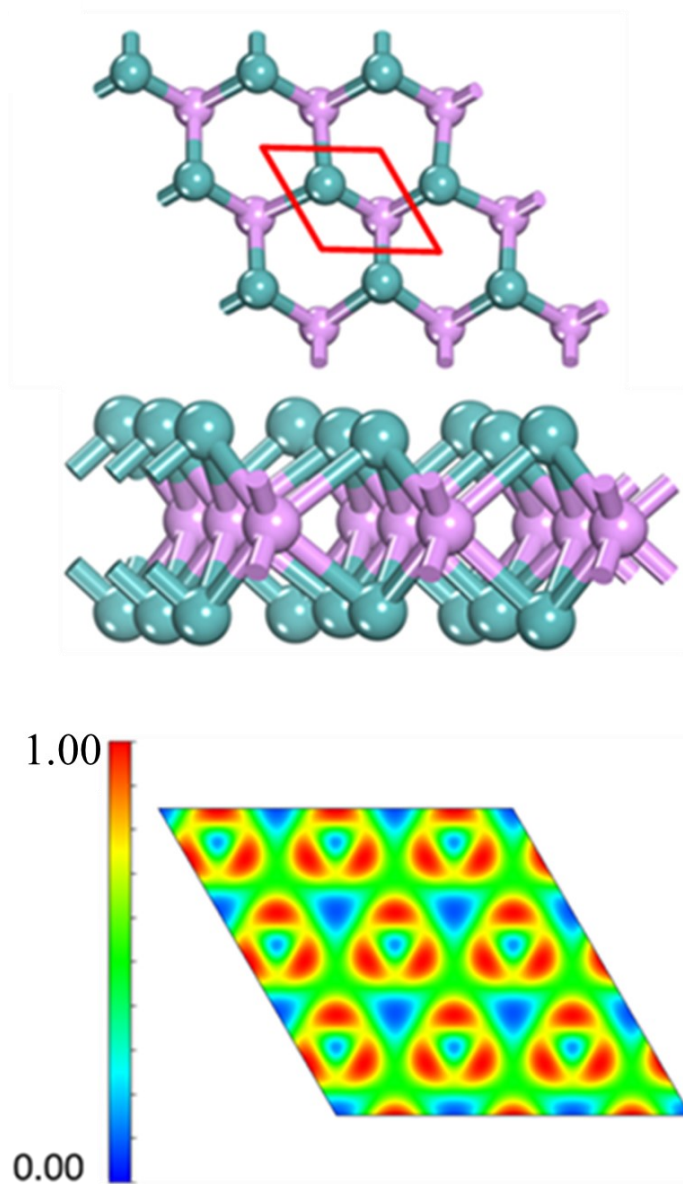

**Fig. S1** Top and side views of the optimized structure of Mo<sub>2</sub>P monolayer, and its contour plots of the electron localization function (ELF). The pink and blue balls represent P and Mo atoms, respectively. The red line outlines a (1 × 1) surface unit cell.

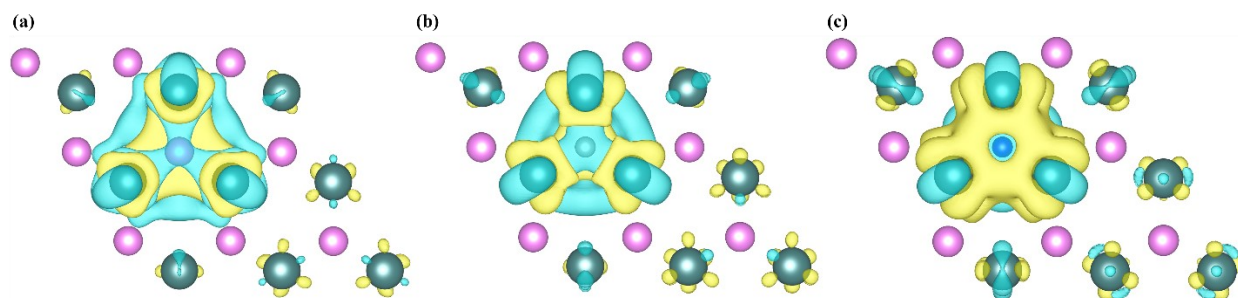

Fig. S2 The charge density difference of (a) Mo<sub>2</sub>P, (b) CMP, and (c) NMP. The yellow and cyan regions represent electron accumulation and depletion. The pink, blue, grey, and dark-blue balls represent the P, Mo, C, and N atoms. The isosurface value is 0.0015e/bohr<sup>3</sup>.

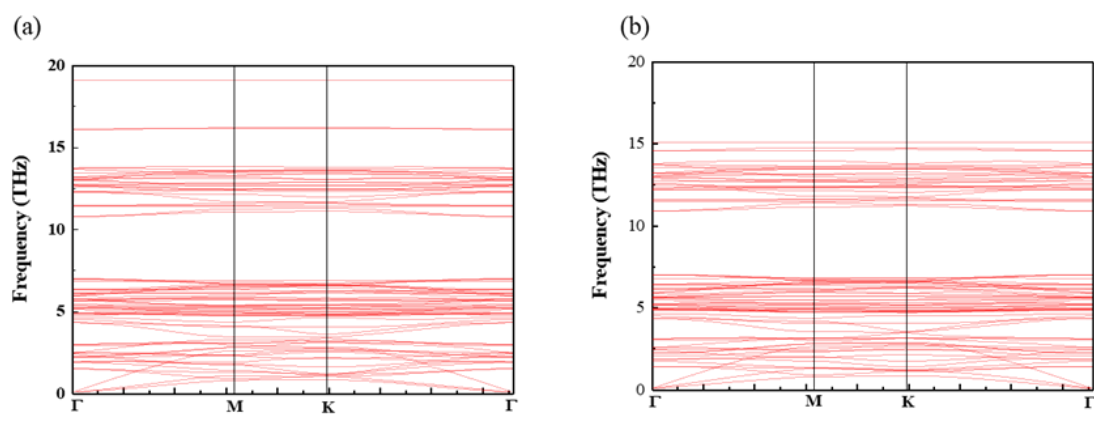

**Fig. S3** Phonon dispersions of the free-standing (a) CMP and (b) NMP monolayers. The absence of any imaginary modes confirms their dynamic stability.

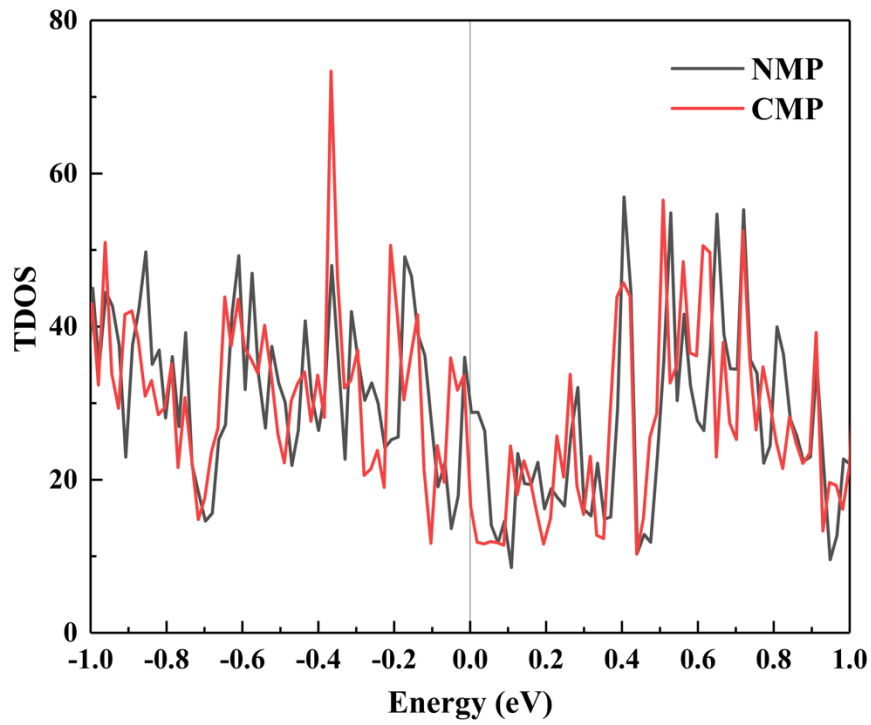

**Fig. S4** The total density of states (TDOS) of the free-standing CMP and NMP monolayers. The Fermi level is set at zero energy.

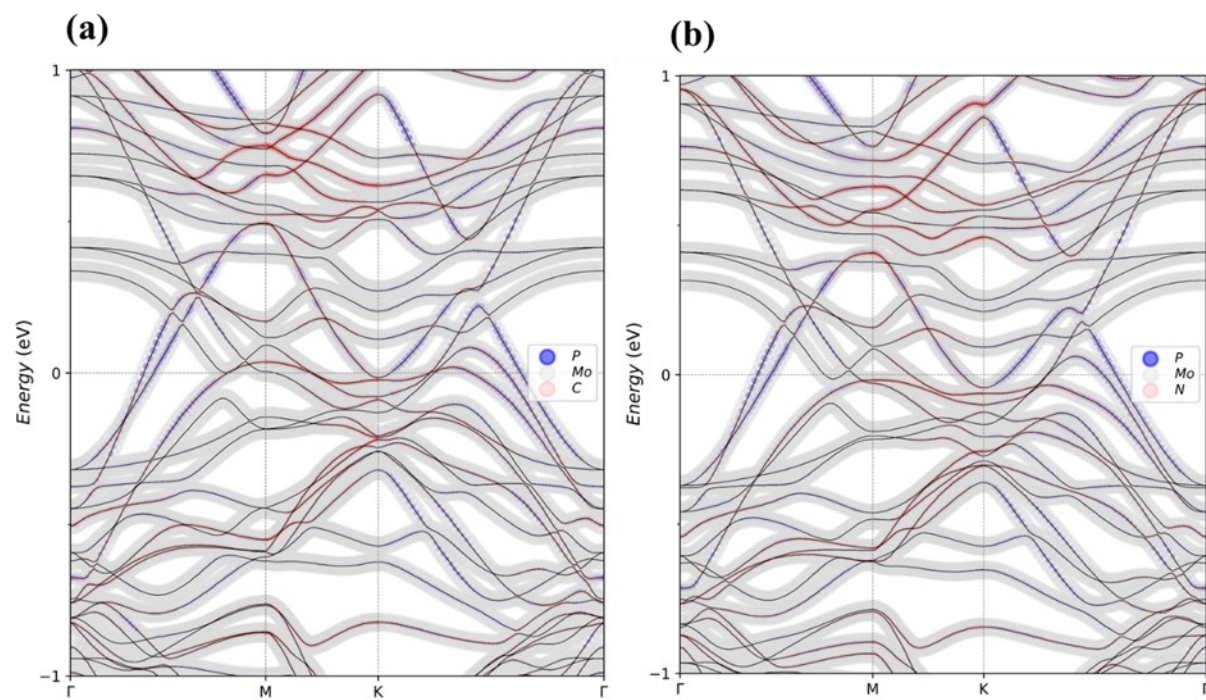

**Fig. S5** The projected band structure in (a) CMP and (b) NMP monolayers. The blue, grey and red curves denote P, Mo, and C(N) sum of orbits, respectively, and the thickness represents the weight of each atom orbitals. The Fermi level is set at 0 eV.

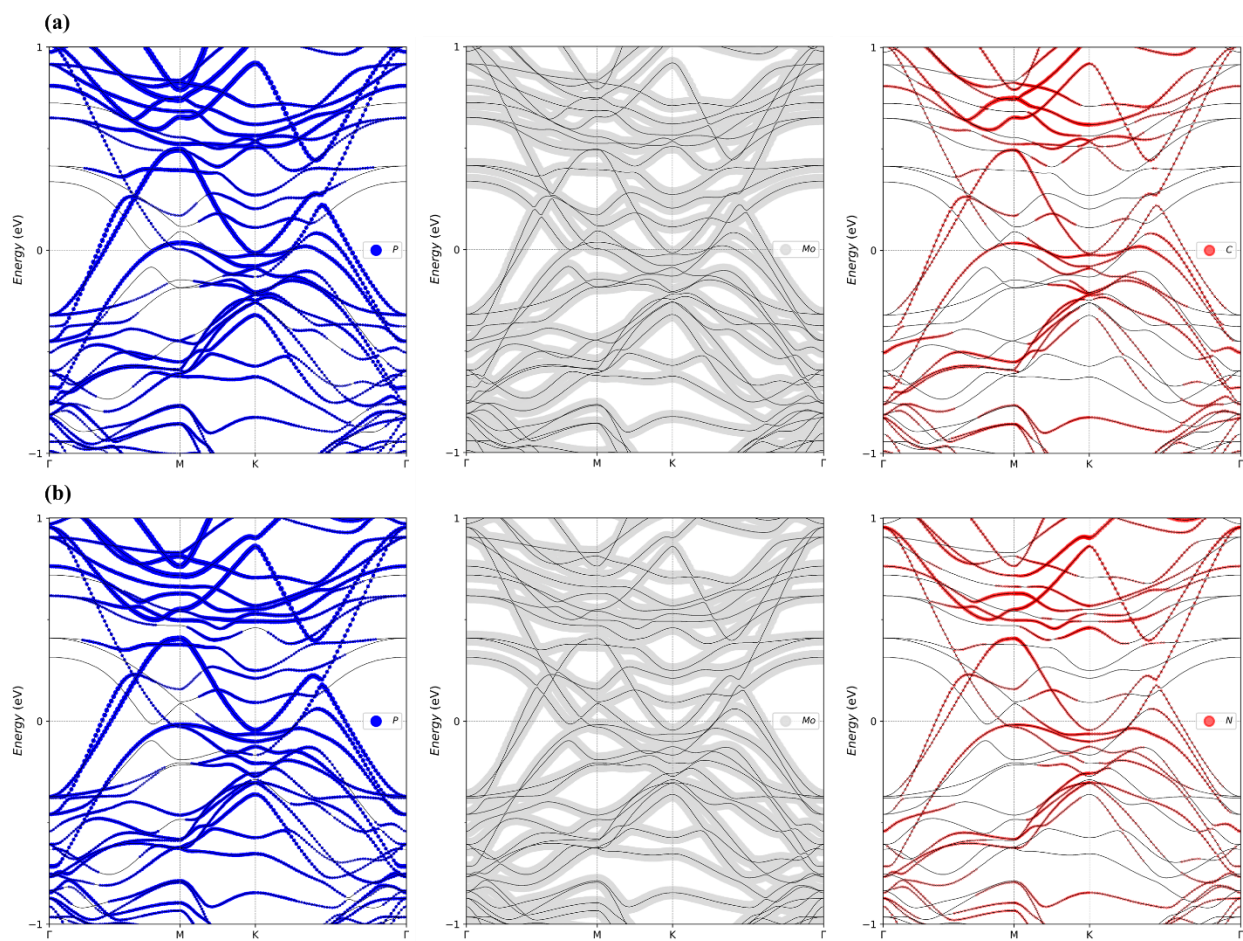

**Fig. S6** The projected band structure of each atom for in (a) CMP and (b) NMP monolayers. The blue, grey and red curves denote P, Mo, and C(N) sum of orbitals, respectively, and the thickness represent the weight of each atom orbitals. The Fermi level is set at 0 eV.

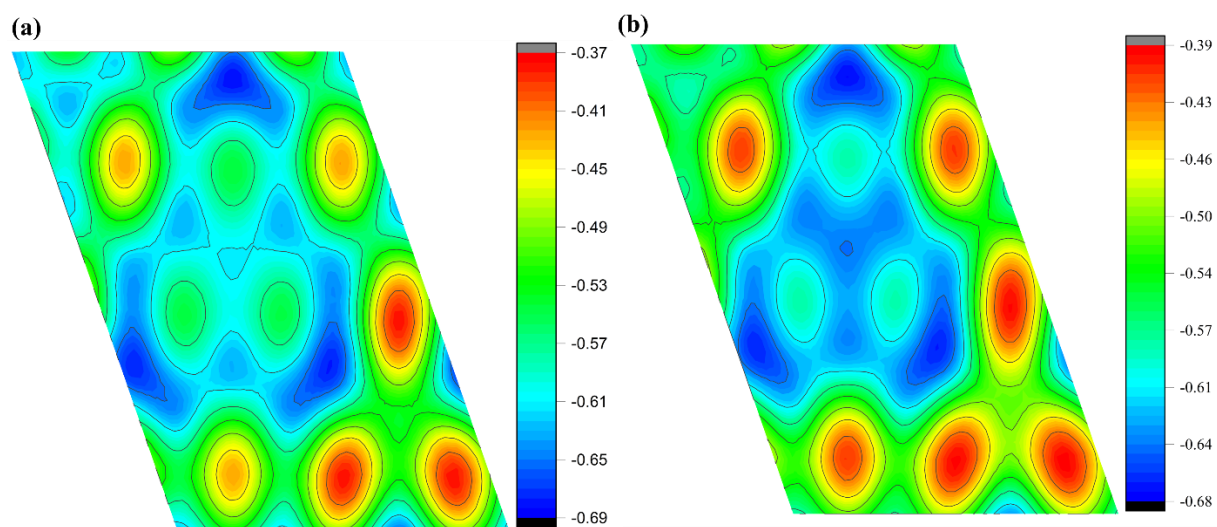

**Fig. S7** The potential energy surfaces of a Li adatom (a) on CMP and (b) on NMP monolayers. The contour spacing in (a) 0.04 eV while it is 0.03 eV in (b).



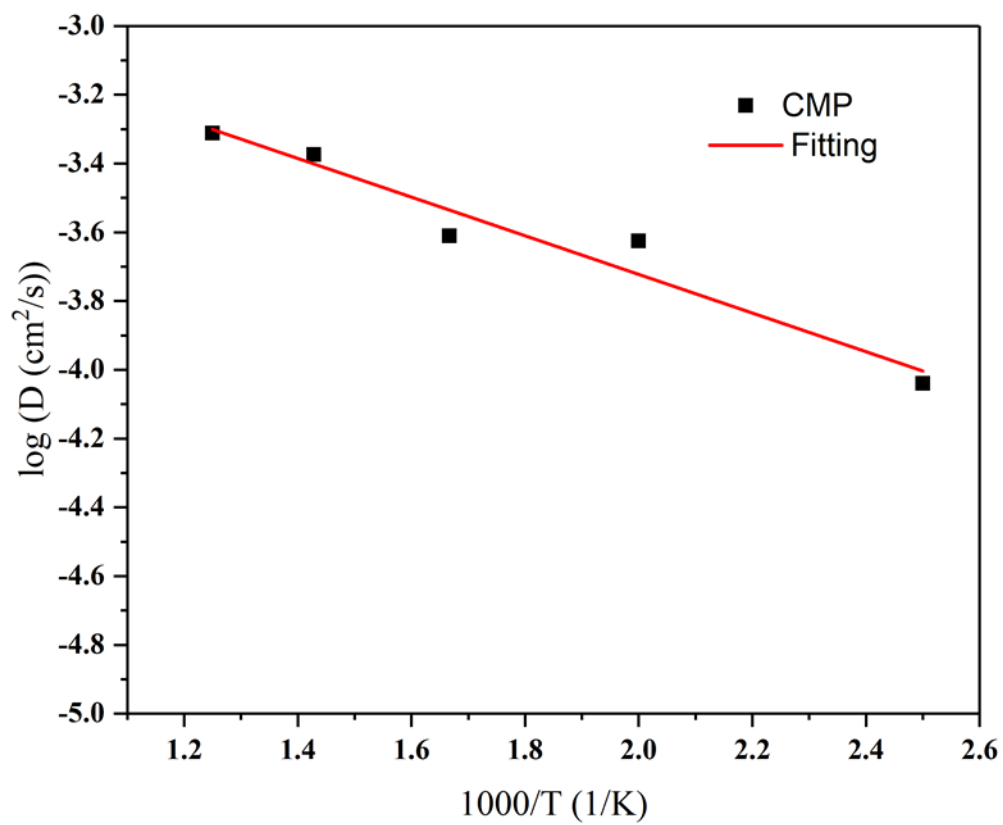

**Fig. S8** Arrhenius plot of CMP overall diffusion coefficient and the fitting line.

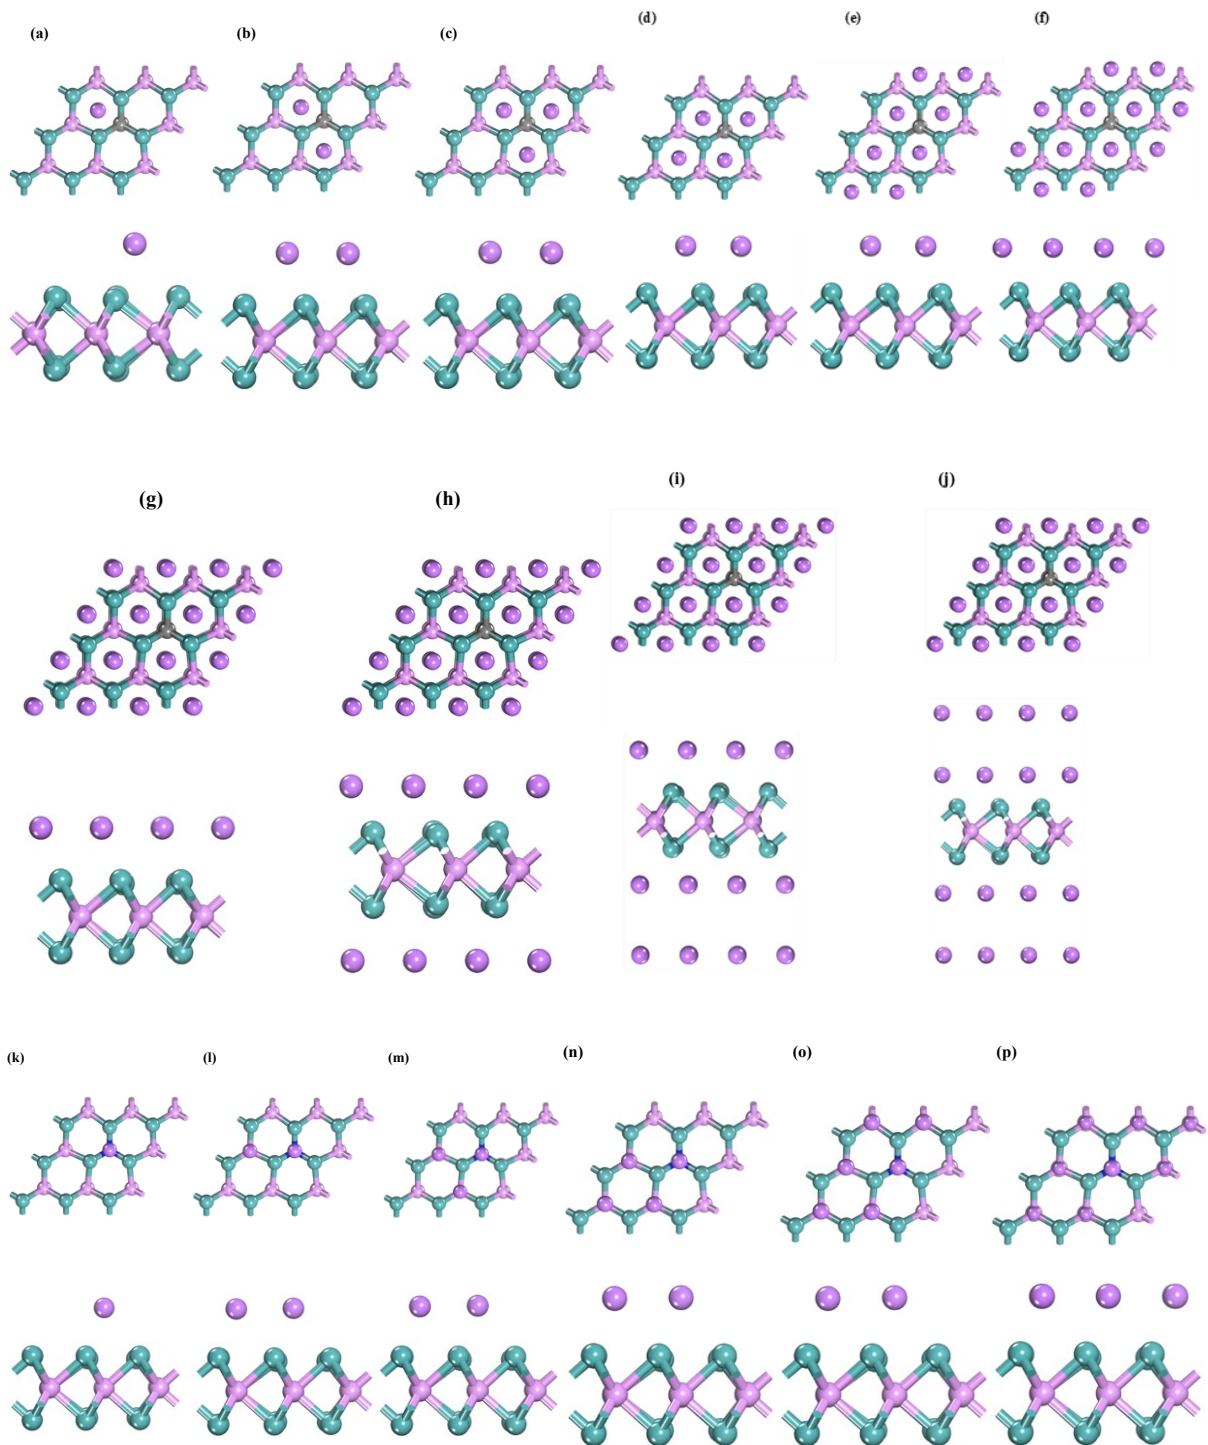

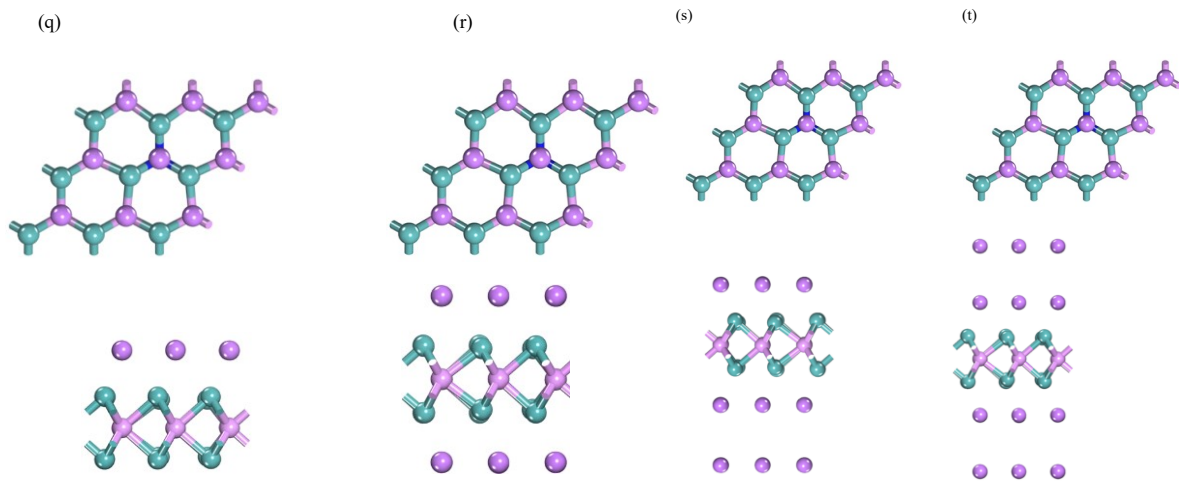

**Fig. S9** (a)-(j) Top and side views of monolayer CMP with different coverage of Li atoms for  $\text{Li}_{0.028}\text{Mo}_{0.50}\text{P}_{0.222}\text{C}_{0.028}$ ,  $\text{Li}_{0.056}\text{Mo}_{0.50}\text{P}_{0.222}\text{C}_{0.028}$ ,  $\text{Li}_{0.083}\text{Mo}_{0.50}\text{P}_{0.222}\text{C}_{0.028}$ ,  $\text{Li}_{0.111}\text{Mo}_{0.50}\text{P}_{0.222}\text{C}_{0.028}$ ,  $\text{Li}_{0.167}\text{Mo}_{0.50}\text{P}_{0.222}\text{C}_{0.028}$ ,  $\text{Li}_{0.222}\text{Mo}_{0.50}\text{P}_{0.222}\text{C}_{0.028}$ ,  $\text{Li}_{0.25}\text{Mo}_{0.50}\text{P}_{0.222}\text{C}_{0.028}$ ,  $\text{Li}_{0.5}\text{Mo}_{0.50}\text{P}_{0.222}\text{C}_{0.028}$ ,  $\text{Li}_{0.75}\text{Mo}_{0.50}\text{P}_{0.222}\text{C}_{0.028}$ , and  $\text{Li}_1\text{Mo}_{0.50}\text{P}_{0.222}\text{C}_{0.028}$ , respectively. (k)-(t) Top side views of monolayer CMP with different coverage of Li atoms for  $\text{Li}_{0.028}\text{Mo}_{0.50}\text{P}_{0.222}\text{N}_{0.028}$ ,  $\text{Li}_{0.056}\text{Li}_{0.028}\text{Mo}_{0.50}\text{P}_{0.222}\text{N}_{0.028}$ ,  $\text{Li}_{0.083}\text{Li}_{0.028}\text{Mo}_{0.50}\text{P}_{0.222}\text{N}_{0.028}$ ,  $\text{Li}_{0.111}\text{Li}_{0.028}\text{Mo}_{0.50}\text{P}_{0.222}\text{N}_{0.028}$ ,  $\text{Li}_{0.167}\text{Li}_{0.028}\text{Mo}_{0.50}\text{P}_{0.222}\text{N}_{0.028}$ ,  $\text{Li}_{0.222}\text{Li}_{0.028}\text{Mo}_{0.50}\text{P}_{0.222}\text{N}_{0.028}$ ,  $\text{Li}_{0.25}\text{Li}_{0.028}\text{Mo}_{0.50}\text{P}_{0.222}\text{N}_{0.028}$ ,  $\text{Li}_{0.5}\text{Li}_{0.028}\text{Mo}_{0.50}\text{P}_{0.222}\text{N}_{0.028}$ ,  $\text{Li}_{0.75}\text{Mo}_{0.50}\text{P}_{0.222}\text{N}_{0.028}$ , and  $\text{Li}_1\text{Li}_{0.028}\text{Mo}_{0.50}\text{P}_{0.222}\text{N}_{0.028}$ , respectively. The pink, blue, grey, and dark blue balls represent P, Mo, C, and N atoms, respectively.

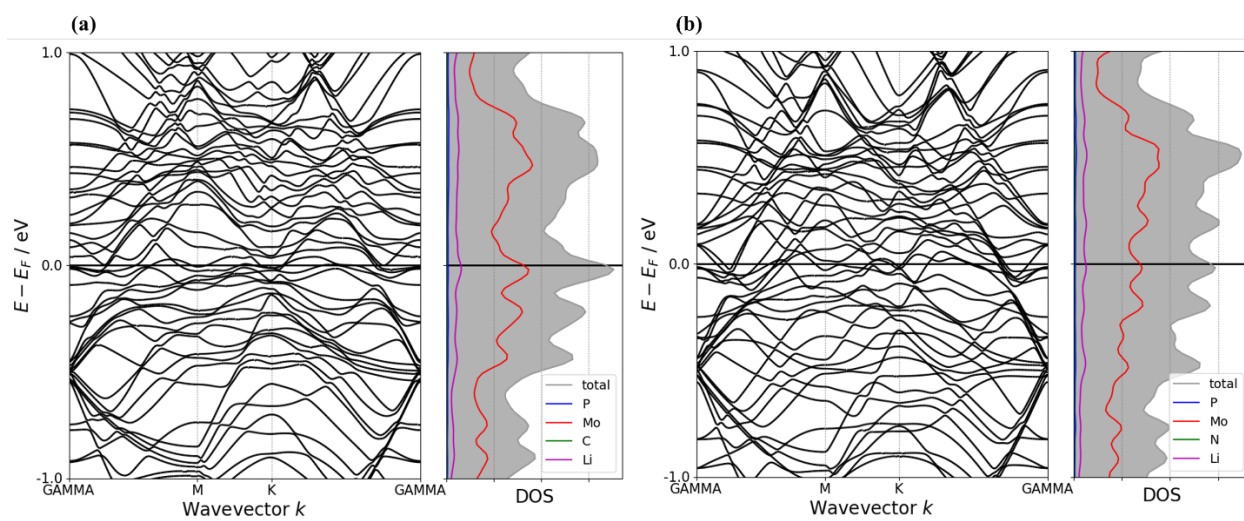

**Fig. S10** The electronic band structure and projected densities of states of (a) CMP and (b) NMP monolayers at 100% lithiation states (including 36 atoms in the supercell containing 27 atoms).

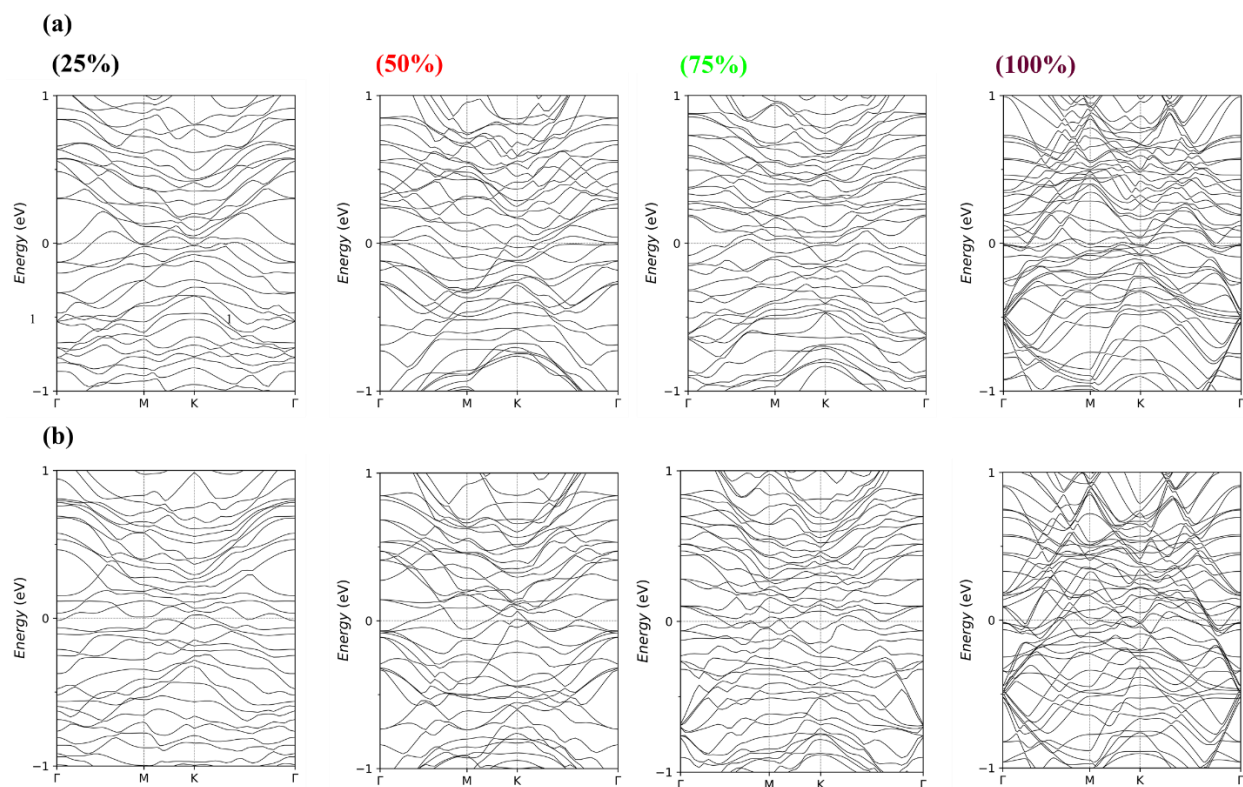

**Fig. S11** The electronic band structure of (a) CMP and (b) NMP monolayers at different degree (25% ~ 100%) lithiation states.

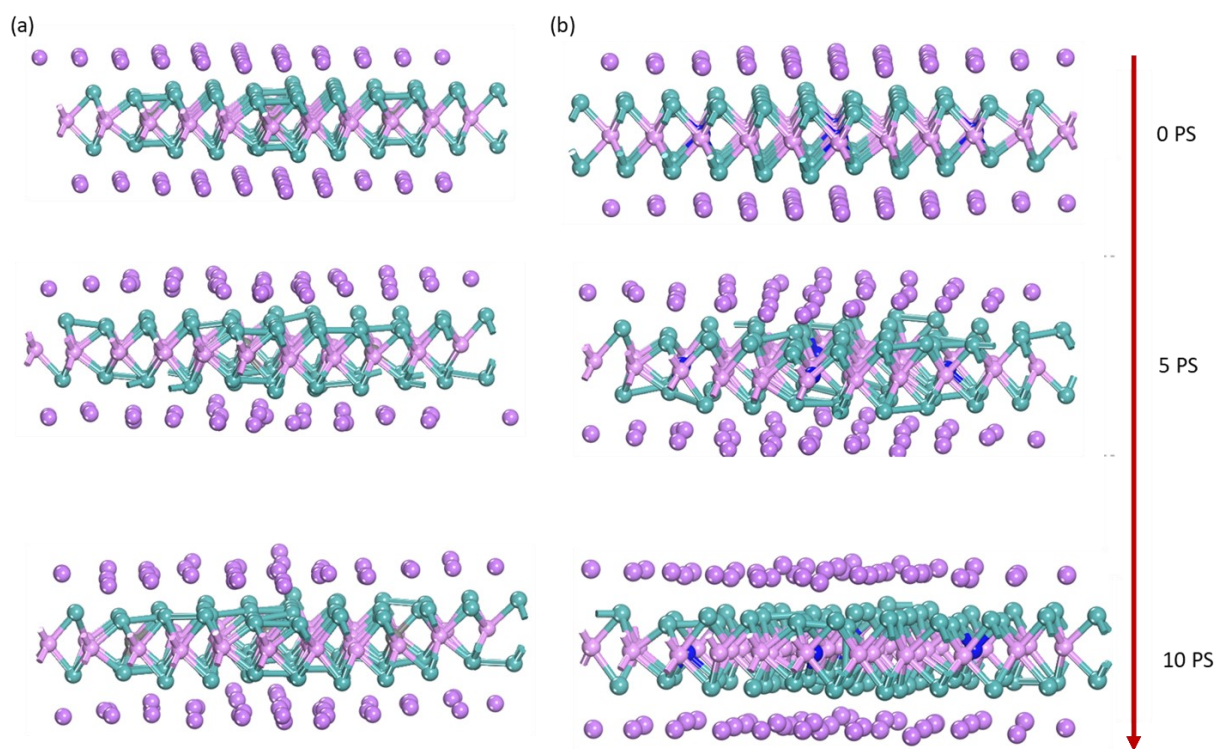

**Fig. S12** (a) Snapshots of trajectories for the CMP monolayer (a) and NMP monolayer at the end of 10 ps AIMD simulations at 300 K. The pink, blue, grey, and navy balls represent P, Mo, C, and N atoms, respectively.

Table S1 Diffusion coefficient with different temperatures calculated using AIMD.

| Temperature (K) | Diffusion Coefficient (cm <sup>2</sup> /s) |
|-----------------|--------------------------------------------|
| 400             | 9.12E-05                                   |
| 500             | 2.37E-04                                   |
| 600             | 2.45E-04                                   |
| 700             | 4.23E-04                                   |
| 800             | 4.88E-04                                   |
